# Supplementary material
Source: PubMed Central journal article supplement (PMC3070165)
Supplement: NIHMS283047-supplement-1.pdf [file NIHMS283047-supplement-1.pdf]

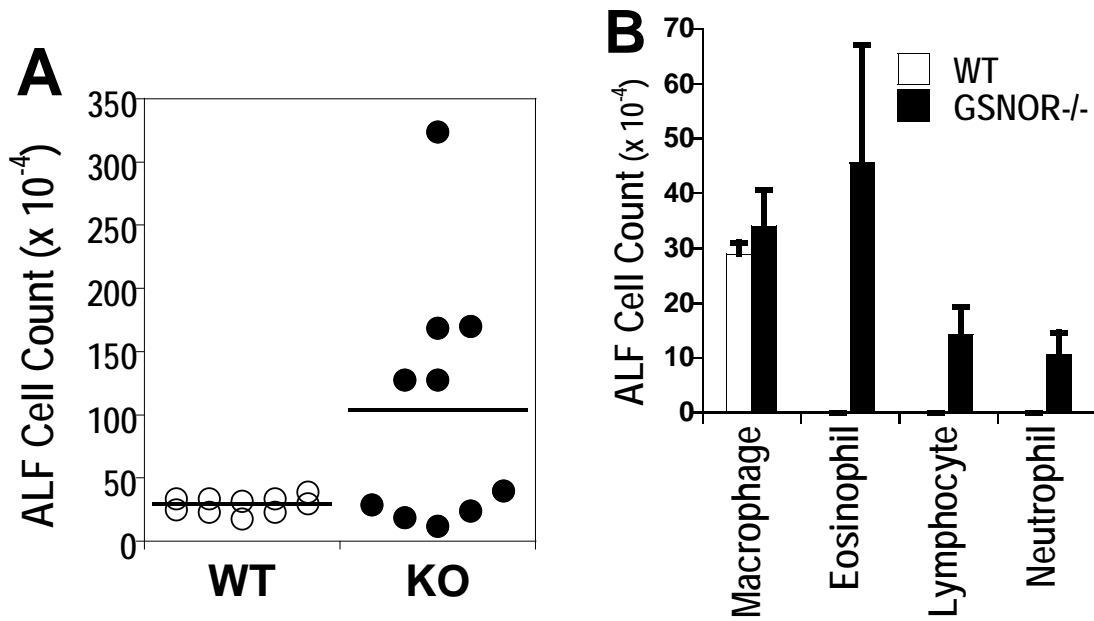

**Supplemental Figure 1.** Increase in leukocyte counts in lung of unchallenged GSNOR<sup>-/-</sup> mice. Total leukocyte counts (A) and counts of major leukocytes (B; mean + SE) in airway lining fluid (ALF) were from 10 wildtype (WT) and 10 GSNOR<sup>-/-</sup> (KO) mice.

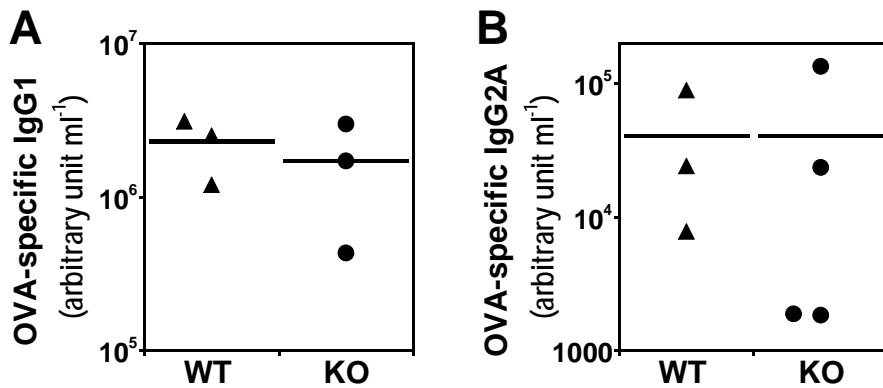

**Supplemental Figure 2.** Antibody production is unimpaired in GSNOR<sup>-/-</sup> mice. Six-week-old mice were immunized with ovalbumin (OVA) and boosted 3 weeks after immunization. Five weeks after the immunization, serum titers of IgG1 (A) and IgG2A (B) specific to OVA were measured using Mouse MonoAB ID KIT (HRP; Invitrogen).

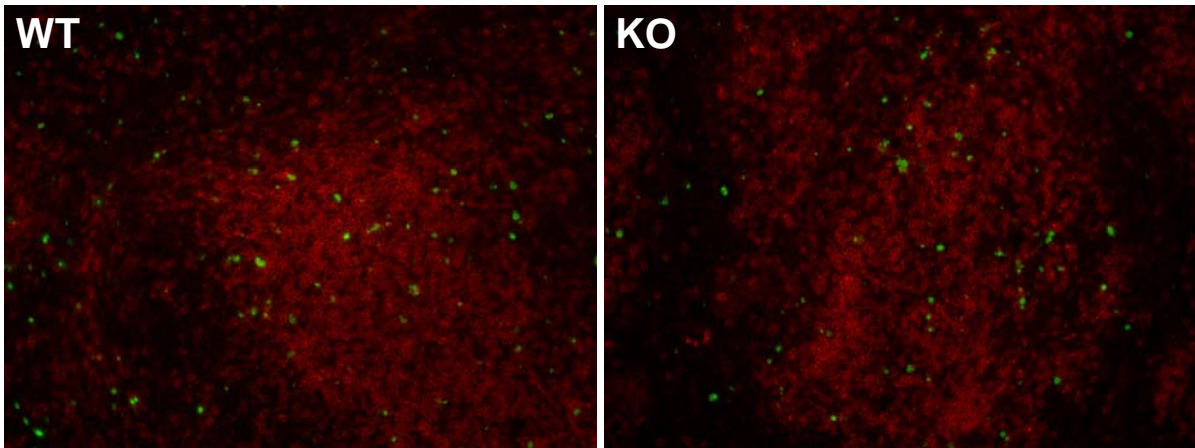

**Supplemental Figure 3.** Apoptosis in spleen of wildtype (WT) and *GSNOR*<sup>-/-</sup> (KO) mice. Apoptotic cells (green) were detected by TUNEL assay. The tissue sections were also stained with anti-CD4 antibody. The data represent 3 independent experiments.

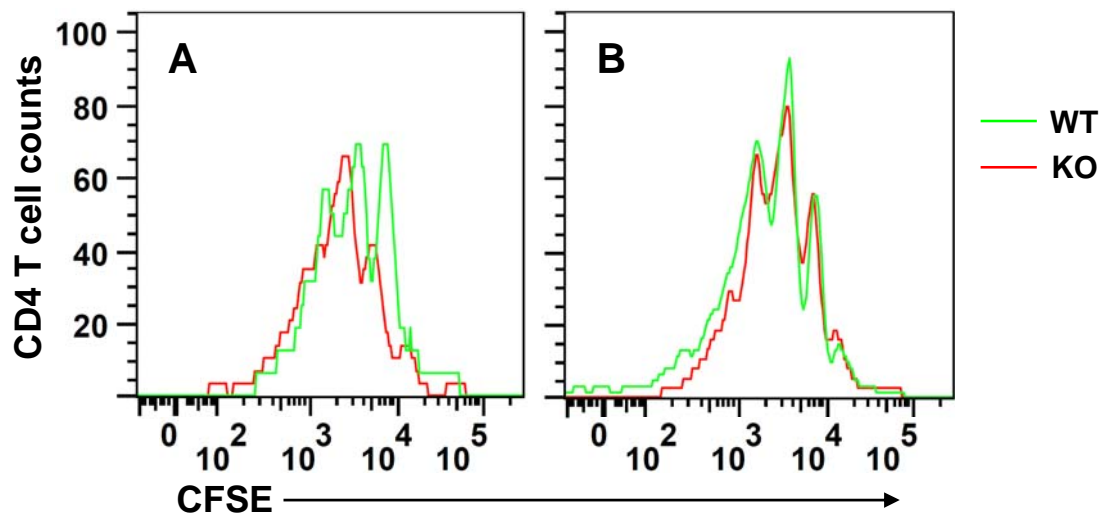

**Supplemental Figure 4.** T cell proliferation in vitro. CD4 T cells, isolated from spleen and mesenteric lymph nodes of wildtype and *GSNOR*<sup>-/-</sup> mice, were labeled with CFSE and incubated for 3 days with anti-CD3 Ab, anti-CD28 Ab, and IL-2 supplemented with either IL-12 (A) or IL-4 (B). The data represent 2 independent experiments.

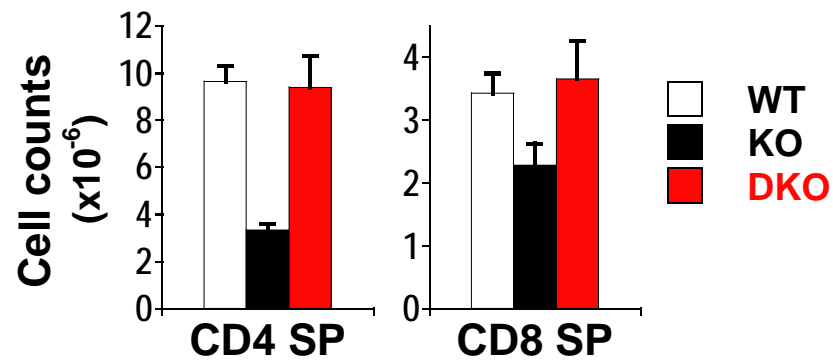

**Supplemental Figure 5.** CD4 SP and CD8 SP cell counts in thymuses of wildtype (WT), *GSNOR*<sup>-/-</sup> (KO), and *GSNOR*<sup>-/-</sup>*iNOS*<sup>-/-</sup> (DKO) mice. The data (mean + SE) are from 6 mice of each strain. The CD4 SP ( $P < 0.001$ ) and CD8 SP ( $P < 0.05$ ) counts in *GSNOR*<sup>-/-</sup> thymus are significantly lower than wildtype controls.

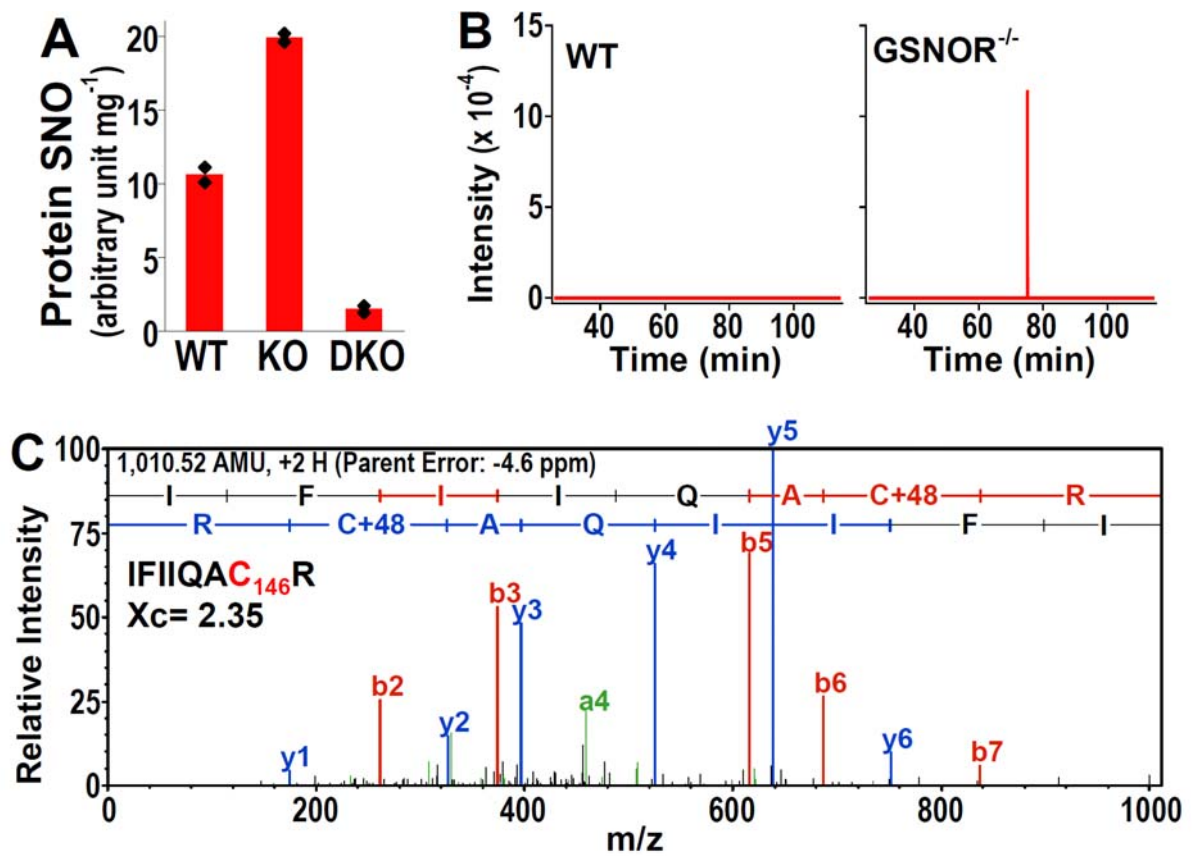

**Supplemental Figure 6.** Protein S-nitrosylation is increased in thymus of  $\text{GSNOR}^{-/-}$  mice. *A*, Content of protein S-nitrosothiols in mouse thymus. *B*, Extracted ion chromatographs at  $m/z$  506.2683 of wildtype and  $\text{GSNOR}^{-/-}$  thymuses. The  $m/z$  value corresponds to the expected  $m/z$  value for doubly charged SNO peptide IFIIQAC<sub>146</sub>R from caspase-6. C<sub>146</sub> is the enzyme active site Cys. *C*, Establishment of the sequence and sulfonation site of the peptide in (*B*) from  $\text{GSNOR}^{-/-}$  thymus by tandem mass spectrometry. The modified caspase-6 peptide is undetectable when the sample is first exposed to UV or treated with copper-ascorbate to destroy SNO.
