# Supplementary material
Source: PubMed Central journal article supplement (PMC3070165)
Supplement: NIHMS283047-supplement-2.pdf [file NIHMS283047-supplement-2.pdf]

**Supplemental Table I. S-nitrosylated proteins in thymus of GSNOR<sup>-/-</sup> mouse**

| Protein name                                               | Accession Number | Molecular Weight (kDa) | Unique peptides MRC <sup>1</sup> | SNO Peptide sequence (n) <sup>2</sup>                                                               |
|------------------------------------------------------------|------------------|------------------------|----------------------------------|-----------------------------------------------------------------------------------------------------|
| <b>26S proteasome non-ATPase regulatory subunit 1</b>      | Q3TXS7           | 106                    | 7                                | C437VAYAESHQALVGDK (2)                                                                              |
| <b>3-ketoacyl-CoA thiolase B, peroxisomal precursor</b>    | Q8VCHO           | 44                     | 6                                | VNPLGGAIALGHPLGC381TGAR (2)                                                                         |
| <b>40S ribosomal protein S11</b>                           | P62281           | 18                     | 2                                | DVQIGDIVTVGEC131RPLSK (2)<br>EAIEGTYIDKKC60PFTGNVSIR (2)<br>KC60PFTGNVSIR (2)<br>NMSVHLSPC116FR (2) |
| <b>40S ribosomal protein S17</b>                           | P63276           | 16                     | 4                                | VC35EEIAIIPSKK (1)                                                                                  |
| <b>40S ribosomal protein S26</b>                           | P62855           | 13                     | 2                                | LHYC74VSCAIHSK (2)                                                                                  |
| <b>40S ribosomal protein S3a</b>                           | P97351           | 30                     | 2                                | AC201QSIYPLHDVFVR (1)                                                                               |
| <b>40S ribosomal protein S6</b>                            | P62754           | 29                     | 2                                | MKLNISFPATGC12QK (2)                                                                                |
| <b>60S ribosomal protein L10a</b>                          | P53026           | 25                     | 2                                | VLC164LAVAVGHVK (2)                                                                                 |
| <b>60S ribosomal protein L12</b>                           | P35979           | 18                     | 4                                | C17TGGEVGSALAPK (2)                                                                                 |
| <b>60S ribosomal protein L13a</b>                          | P19253           | 23                     | 2                                | C38EGINISGNFYR (1)                                                                                  |
| <b>60S ribosomal protein L3</b>                            | P27659           | 46                     | 2                                | TVFAEHISDEC114KR (2)                                                                                |
| <b>60S ribosomal protein L7</b>                            | P14148           | 31                     | 3                                | FGIIC208MEDLIHEIYTVGKR (1)                                                                          |
| <b>60S ribosomal protein L7a</b>                           | P12970           | 30                     | 2                                | TC199TTVAFTQVNSDKGALAK (2)                                                                          |
| <b>60S ribosomal protein L8</b>                            | P62918           | 28                     | 2                                | TELFIAAEGIHTGQFVYC90GKK (1)                                                                         |
| <b>Aconitate hydratase, mitochondrial precursor</b>        | Q99KI0           | 85                     | 15                               | C410KSQFTITPGSEQIR (2)<br>VAVPSTIHC126DHLIEAQVGGEK (2)                                              |
| <b>Actin, cytoplasmic 1</b>                                | P60710 (+1)      | 42                     | 22                               | C285DVDIRKDLYANTVLSGGTTMYPGIADR (1)                                                                 |
| <b>Actin-related protein 2</b>                             | P61161           | 45                     | 2                                | LC221YVGYNIEQEYK (2)                                                                                |
| <b>Adenylyl cyclase-associated protein 1</b>               | P40124           | 52                     | 4                                | AVGRLEAVSHTSDMHC29GYGDSK (2)<br>C355VNTTLQIK (2)                                                    |
| <b>Aldose reductase</b>                                    | P45376           | 36                     | 7                                | HIDC45AQVYQNEKEVGVALQEK (2)                                                                         |
| <b>Aspartyl-tRNA synthetase, cytoplasmic</b>               | Q922B2           | 57                     | 9                                | IGSC130TQQDVELHVQK (2)                                                                              |
| <b>ATP synthase subunit alpha, mitochondrial precursor</b> | Q03265           | 60                     | 5                                | LYC244IYVAIGQKR (2)                                                                                 |

|                                                                   |        |     |    |                                                                                |
|-------------------------------------------------------------------|--------|-----|----|--------------------------------------------------------------------------------|
| <b>ATP synthase subunit gamma, mitochondrial precursor</b>        | Q91VR2 | 56  | 9  | GLC103GAIHSSVAK (1)                                                            |
| <b>ATP-citrate synthase</b>                                       | Q91V92 | 120 | 8  | YIC20TTSAIQNR (2)                                                              |
| <b>ATP-dependent RNA helicase A</b>                               | O70133 | 149 | 2  | VRPGFCFHLC779SR (2)                                                            |
| <b>ATP-dependent RNA helicase DDX39</b>                           | Q8VDW0 | 49  | 3  | NC164PHVVVGTGTPGR (1)                                                          |
| <b>Caspase-6</b>                                                  | O08738 | 32  | 8  | IFIIQAC146R<br>KLHFC271PKPSK (2)                                               |
| <b>Catalase</b>                                                   | P24270 | 60  | 5  | LC460ENIAGHLK (2)                                                              |
| <b>Cathepsin B precursor</b>                                      | P10605 | 37  | 5  | ILRGENHC319GIESEIVAGIPR (2)                                                    |
| <b>Cathepsin L1 precursor</b>                                     | P06797 | 38  | 2  | DRDNHC322GLATAASYPVVN (1)                                                      |
| <b>Clathrin heavy chain</b>                                       | Q68FD5 | 192 | 11 | YC910EKRDPHLAC919VAYER (1)                                                     |
| <b>Cofilin-1</b>                                                  | P18760 | 19  | 5  | AVLFC39LSEDKK (2)<br>LTGIKHELQANC139YEEVKDR (2)                                |
| <b>Coronin-1A</b>                                                 | O89053 | 51  | 8  | KC345EPIAMTVPR (2)<br>DGALICTSC195R (2)                                        |
| <b>Cullin-associated NEDD8-dissociated protein 1</b>              | Q6ZQ38 | 136 | 8  | C356LDAVVSTRHEMLPEFYK (2)                                                      |
| <b>Cystatin-B</b>                                                 | Q62426 | 11  | 6  | VDVGGDKC64VHLR (2)                                                             |
| <b>Cysteine and glycine-rich protein 1</b>                        | P97315 | 21  | 6  | NLDSTTVAVHGEEIYC58K (1)                                                        |
| <b>Cysteine-rich protein 2</b>                                    | Q9DCT8 | 23  | 2  | C8DKTVYFAEK (2)                                                                |
| <b>Cytochrome b-c1 complex subunit 1, mitochondrial precursor</b> | Q9CZ13 | 53  | 3  | NALVSHLDGTTTPVC410EDIGR (1)                                                    |
| <b>Cytochrome b-c1 complex subunit 2, mitochondrial precursor</b> | Q9DB77 | 48  | 3  | NALANPLYC192PDYR (1)                                                           |
| <b>Cytoplasmic FMR1-interacting protein 2</b>                     | Q5SQX6 | 146 | 4  | C98NEQPNRVEIYEK (2)                                                            |
| <b>Cytosol aminopeptidase</b>                                     | Q9CPY7 | 56  | 9  | LILADALC376YAHTFNPK (2)                                                        |
| <b>Cytosolic non-specific dipeptidase</b>                         | Q9D1A2 | 53  | 4  | DVGAETLLHSC300K (1)                                                            |
| <b>D-3-phosphoglycerate dehydrogenase</b>                         | Q61753 | 57  | 8  | VLISDSLDPCL8C19RK (2)<br>ALVDHENVISC280PHLGASTK (1)<br>NAGTC369LSPAIVIGLLR (1) |
| <b>Dextrin</b>                                                    | Q9R0P5 | 19  | 5  | AVIFC39LSADKK (1)                                                              |
| <b>Dihydropyrimidinase-related protein 2</b>                      | O08553 | 62  | 5  | THNSALEYNIFEGMEC439R (1)                                                       |
| <b>DNA replication licensing factor MCM6</b>                      | P97311 | 93  | 4  | LVFLAC301HVAPTNP (2)                                                           |
| <b>DNA replication licensing factor MCM7</b>                      | Q61881 | 81  | 8  | GNIHIC378LMGDPGVAK (1)                                                         |

|                                                                         |        |     |    |                                                                  |
|-------------------------------------------------------------------------|--------|-----|----|------------------------------------------------------------------|
| <b>DNA-directed RNA polymerase II subunit RPB9</b>                      | P60898 | 15  | 2  | C89GHKEAVFFQSHSAR (2)                                            |
| <b>Elongation factor 2</b>                                              | P58252 | 95  | 13 | NMSVIAHVDHKGKSTLTDSLVC41KAGIIASAR (2)                            |
| <b>ES1 protein homolog, mitochondrial precursor</b>                     | Q9D172 | 28  | 3  | ALGAKHC219VKGVTEAHVDQK (2)                                       |
| <b>Eukaryotic translation initiation factor 5A-1</b>                    | P63242 | 17  | 7  | KYEDIC73PSTHNMDVPNIKR (1)                                        |
| <b>Fatty acid synthase</b>                                              | P19096 | 272 | 55 | C1464ILLSNLSNTSHAPK (2)<br>FVFTPHMEAEC1128LSESTALQK (1)          |
| <b>FK506-binding protein 5</b>                                          | Q64378 | 51  | 6  | KGEIC103HLLCKPEYAYGSAGHLQK (2)                                   |
| <b>Fructose-bisphosphate aldolase A</b>                                 | P05064 | 39  | 6  | ALSDHHVYLEGTLLKPNMVTTPGHAC240TQK (1)                             |
| <b>Galectin-1</b>                                                       | P16045 | 15  | 6  | FNAHGDANTIVC61NTK (2)<br>SFVLNLGKDSNNLC43LHFNPR (2)              |
| <b>Galectin-9</b>                                                       | O08573 | 40  | 2  | C258GGDIAFHLNPR (2)<br>FEEGGYVVC73NTK (2)<br>GMPFELC101FLVQR (2) |
| <b>Glucosamine-fructose-6-phosphateaminotransferase [isomerizing] 1</b> | O88958 | 33  | 2  | C2GIFAYLNYHVPR (1)<br>ETDC476GVHINAGPEIGVASTK (2)                |
| <b>Glutaredoxin-3</b>                                                   | Q9CQM9 | 38  | 7  | LTHAAPC148MLFMK (1)                                              |
| <b>Glutathione reductase, mitochondrial precursor</b>                   | P47791 | 54  | 2  | GVYAVGDVC355GK (1)                                               |
| <b>Glyceraldehyde-3-phosphate dehydrogenase</b>                         | P16858 | 36  | 10 | VTPNVSVVDLTC245R (2)                                             |
| <b>Glycerol-3-phosphate dehydrogenase, mitochondrial precursor</b>      | Q64521 | 81  | 7  | C270KDVLTGQEFDVR (2)                                             |
| <b>Guanine nucleotide-binding protein G(i), alpha-2 subunit</b>         | P08752 | 40  | 8  | EIYTHFTC326ATDTK (2)                                             |
| <b>Guanine nucleotide-binding protein G(I)/G(S)/G(T) subunit beta-1</b> | P62874 | 37  | 2  | ELAGHTGYLSC148C149R (2)                                          |
| <b>Guanine nucleotide-binding protein subunit beta-2-like 1</b>         | P68040 | 35  | 6  | TNHIGHTGYLNTVTVSPDGLC207ASGGK (1)                                |
| <b>H-2 class II histocompatibility antigen, A beta chain precursor</b>  | P14483 | 30  | 2  | TRAEIDTVC106RHNYEGPETHTSLR (1)                                   |
| <b>Heat shock cognate 71 kDa protein</b>                                | P63017 | 71  | 15 | GPAVGIDLGTTYSC17VGVFQHGK (2)                                     |
| <b>Heat shock protein HSP 90-beta</b>                                   | P11499 | 83  | 22 | C412LELFSELAEDKENYKK (2)                                         |
| <b>Hemoglobin subunit alpha</b>                                         | P01942 | 15  | 7  | LLSHC105LLVTLASHHPADFTPAVHASLDK (2)                              |
| <b>Hemoglobin subunit beta-1</b>                                        | P02088 | 16  | 9  | GTFASLSELHC94DKLHVDPENFR (2)                                     |
| <b>Heterogeneous nuclear ribonucleoprotein A3</b>                       | Q8BG05 | 40  | 8  | GFGFVTYSC85VEEVDAAMC94ARPHKVDGR (1)                              |
| <b>Heterogeneous nuclear ribonucleoprotein D0</b>                       | Q60668 | 38  | 5  | GFC226FITFKEEEPVKK (1)                                           |

|                                                                                               |        |     |    |                                                                               |
|-----------------------------------------------------------------------------------------------|--------|-----|----|-------------------------------------------------------------------------------|
| <b>Heterogeneous nuclear ribonucleoprotein F</b>                                              | Q9Z2X1 | 46  | 4  | DLSYC267LSGMYDHR (1)                                                          |
| <b>Heterogeneous nuclear ribonucleoprotein H</b>                                              | O35737 | 49  | 7  | DLNYC267FSGMSDHR (2)                                                          |
| <b>Heterogeneous nuclear ribonucleoprotein L</b>                                              | Q8R081 | 60  | 9  | LC578FSTAQHAS (2)                                                             |
| <b>Heterogeneous nuclear ribonucleoprotein M</b>                                              | Q9D0E1 | 78  | 5  | DKFNEC675GHVLYADIK (1)                                                        |
| <b>Heterogeneous nuclear ribonucleoproteins C1/C2</b>                                         | Q9Z204 | 34  | 3  | IVGC46SVHKGFAFVQYVNER (2)                                                     |
| <b>High mobility group protein B1</b>                                                         | P63158 | 25  | 6  | RPPSAFFLFC106SEYRPK (2)                                                       |
| <b>Histidine triad nucleotide-binding protein 1</b>                                           | P70349 | 14  | 3  | IIFEDDRC38LAFHDISPQAPTHFLVIPK (2)                                             |
| <b>Histone-binding protein RBBP7</b>                                                          | Q60973 | 48  | 4  | TPSSDVLVFDYTKHPAKPDPSGEC166NPDLR (1)<br>VHIPNDDAQFDASHC97DSDKGEFGGFGSVTGK (1) |
| <b>Hypoxanthine-guanine phosphoribosyltransferase</b>                                         | P00493 | 25  | 3  | DLNHVC206VISETGK (1)                                                          |
| <b>Inositol monophosphatase</b>                                                               | O55023 | 30  | 4  | EKYPC64HSFIGEESVAAGEK (1)                                                     |
| <b>Isocitrate dehydrogenase [NAD] subunit alpha, mitochondrial precursor</b>                  | Q9D6R2 | 40  | 3  | C351SDFTEEIC359R (2)                                                          |
| <b>Isocitrate dehydrogenase [NADP], mitochondrial precursor</b>                               | P54071 | 51  | 4  | DLAGC418IHGLSNVK (2)                                                          |
| <b>Lamin B1</b>                                                                               | P14733 | 67  | 2  | C199QSLTEDLEFRK (2)                                                           |
| <b>Long-chain specific acyl-CoA dehydrogenase, mitochondrial precursor</b>                    | P51174 | 48  | 6  | AFVDSC351LQLHETKR (2)<br>LAELKTHIC342VTR (2)                                  |
| <b>Lymphocyte antigen 75 precursor</b>                                                        | Q60767 | 197 | 6  | C83LGLDITK (1)                                                                |
| <b>Macrophage migration inhibitory factor</b>                                                 | P34884 | 13  | 4  | LLC81GLLSDRLHISPDR (1)                                                        |
| <b>Malate dehydrogenase, cytoplasmic</b>                                                      | P14152 | 37  | 4  | SAPSIPKENFSC154LTR (2)                                                        |
| <b>Malate dehydrogenase, mitochondrial precursor</b>                                          | P08249 | 36  | 7  | EGVVEC275SFVQSK (2)                                                           |
| <b>Myosin light polypeptide 6</b>                                                             | Q60605 | 17  | 2  | ILYSQC32GDVMR (2)                                                             |
| <b>NADH dehydrogenase [ubiquinone] 1 alpha subcomplex subunit 10, mitochondrial precursor</b> | Q99LC3 | 41  | 2  | VITVDGNIC67SGK (1)                                                            |
| <b>NADH-ubiquinone oxidoreductase 75 kDa subunit, mitochondrial precursor</b>                 | Q91VD9 | 80  | 7  | FC64YHERLSVAGNC75R (2)                                                        |
| <b>NADPH--cytochrome P450 reductase</b>                                                       | P37040 | 77  | 2  | LIHEGGAHIYVC630GDAR (1)<br>VHPNSVHIC489AVAVEYEAK (1)                          |
| <b>Non-POU domain-containing octamer-binding protein</b>                                      | Q99K48 | 55  | 3  | FAC147HSASLTVR (1)                                                            |
| <b>PDZ and LIM domain protein 1</b>                                                           | O70400 | 36  | 7  | GHFFVEDQIYC305EKHAR (2)                                                       |
| <b>Peptidyl-prolyl cis-trans isomerase A</b>                                                  | P17742 | 18  | 12 | IIPGFMC62QGGDFTR (2)<br>HTGPGILSMANAGPNTNGSQFFIC115TAK (2)                    |

|                                                                                           |                   |     |    |                                                                                           |
|-------------------------------------------------------------------------------------------|-------------------|-----|----|-------------------------------------------------------------------------------------------|
| <b>Poly(rC)-binding protein 1</b>                                                         | P60335            | 37  | 6  | C201SDAAGYPHATHDLEGPPPLDAYSIQQQHTISPLDLAK (2)                                             |
| <b>Profilin-1</b>                                                                         | P62962            | 15  | 7  | C128YEMASHLR (1)<br>C71SVIRDSLLQDGEFTMDLR (2)                                             |
| <b>Proliferating cell nuclear antigen</b>                                                 | P17918            | 29  | 6  | C62DRNLAMGVNLTSMK (2)<br>IC148RDLSHIGDAVVISC162AK (2)                                     |
| <b>Proliferation-associated protein 2G4</b>                                               | P50580            | 44  | 8  | KADVIKAAHLC149AEAALR (1)                                                                  |
| <b>Proteasome subunit alpha type-3</b>                                                    | O70435            | 28  | 3  | C42KDGVVFGVEK (2)                                                                         |
| <b>Proteasome subunit beta type-10 precursor</b>                                          | O35955            | 29  | 3  | ATNDSVVADKSC70EKIHFIAPK (2)                                                               |
| <b>Protein FAM115C</b>                                                                    | Q921K8            | 102 | 4  | VVLAHEAMLC279APK (2)<br>DVAC335GANHTLVLDSQKR (2)                                          |
| <b>Protein RCC2</b>                                                                       | Q8BK67            | 56  | 9  | TVVSGSC156AAHSLITTEGK (2)                                                                 |
| <b>Pyruvate dehydrogenase E1 component subunit beta, mitochondrial precursor</b>          | Q9D051            | 39  | 3  | PVGHC249LEAAAVLSK (1)                                                                     |
| <b>Pyruvate kinase isozymes M1/M2</b>                                                     | P52480            | 58  | 16 | AGKPVIC326ATQMLESNIK (2)                                                                  |
| <b>Rab GDP dissociation inhibitor beta</b>                                                | Q61598            | 51  | 9  | AYDATTHFETTC414DDIKDIYKR (2)                                                              |
| <b>Ras-related protein Rab-14</b>                                                         | Q91V41            | 24  | 8  | FMADC40PHTIGVEFGTR (1)                                                                    |
| <b>RNA-binding protein Raly</b>                                                           | Q64012            | 33  | 6  | VAGC51SVHKGYAFVQYANER (2)                                                                 |
| <b>Serine protease inhibitor A3K</b>                                                      | P07759<br>Q03734  | 47  | 3  | HFRDEELSC259SVLELK (1)                                                                    |
| <b>Serine/threonine-protein phosphatase 2A 56 kDa regulatory subunit gamma isoform</b>    | Q60996,<br>Q61151 | 55  | 5  | C351VSSPHFQVAER (1)                                                                       |
| <b>Serine/threonine-protein phosphatase 6 regulatory ankyrin repeat subunit B</b>         | B2RXR6            | 107 | 2  | TC408LHAAAAGGNVEC420IK (2)                                                                |
| <b>Serotransferrin precursor</b>                                                          | Q921I1            | 77  | 7  | C543LVEKGDVAFVK (2)                                                                       |
| <b>S-formylglutathione hydrolase</b>                                                      | Q9R0P3            | 31  | 4  | C11FGGLQK (1)                                                                             |
| <b>Spliceosome RNA helicase Bat1</b>                                                      | Q9Z1N5            | 49  | 7  | NC165PHIVVGTPGR (1)                                                                       |
| <b>Succinate dehydrogenase [ubiquinone] flavoprotein subunit, mitochondrial precursor</b> | Q8K2B3            | 73  | 7  | GC357GPEKDHVYLQLHHLPPPEQLATR (2)<br>GVIALC238IEDGSIHR (2)<br>TYFSC266TSAHTSTGDGTAMVTR (2) |
| <b>SUMO-activating enzyme subunit 1</b>                                                   | Q9R1T2            | 39  | 3  | DVIKVDQIC150HR (2)                                                                        |
| <b>TAR DNA-binding protein 43</b>                                                         | Q921F2            | 45  | 4  | YRNPVQC50MR (2)                                                                           |
| <b>T-complex protein 1 subunit epsilon</b>                                                | P80316            | 60  | 6  | IAILTC253PFEPKPK (2)                                                                      |
| <b>Thioredoxin</b>                                                                        | P10639            | 12  | 3  | C73MPTFQFYK (1)                                                                           |

|                                                                   |        |     |    |                                                                 |
|-------------------------------------------------------------------|--------|-----|----|-----------------------------------------------------------------|
| <b>Thyroid hormone-inducible hepatic protein</b>                  | Q62264 | 17  | 2  | SIC67VEVDHGLLPR (1)                                             |
| <b>Transcription elongation factor SPT5</b>                       | O55201 | 121 | 3  | VELHSTC734QTISVDR (2)                                           |
| <b>Transitional endoplasmic reticulum ATPase</b>                  | Q01853 | 89  | 18 | LADDVDLEQVANETHGHVGDLAALC415SEAALQA<br>IR (1)                   |
| <b>Transketolase</b>                                              | P40142 | 68  | 15 | TVPFC386STFAAFFTR (2)                                           |
| <b>Trifunctional enzyme subunit beta, mitochondrial precursor</b> | Q99JY0 | 51  | 5  | KDGGQYALVAAC459AAGGQGHAMIVEAYPK<br>(1)                          |
| <b>Triosephosphate isomerase</b>                                  | P17751 | 27  | 8  | VSHALAEGLGVIAC127IGEK (2)<br>IYGGSVTGATC218K (2)                |
| <b>Tubulin beta-5 chain</b>                                       | P99024 | 50  | 22 | REIVHIQAGQC12GNQIGAK (2)                                        |
| <b>Ubiquitin-like modifier-activating enzyme 1 X</b>              | Q02053 | 118 | 18 | YSRPAQLHIGFQALHQFC340ALHNQPPRPR (1)<br>C588VYYRKPLLESGTLGTK (1) |
| <b>Valyl-tRNA synthetase</b>                                      | Q9Z1Q9 | 140 | 3  | C681GEMAQAASAAVTR (1)<br>C1184SIHLQLQLVDPAR (2)                 |
| <b>Voltage-dependent anion-selective channel protein 1</b>        | Q60932 | 32  | 4  | EHINLGC140DVDFDIAGPSIR (1)<br>YQVDPDAC245FSAK (1)               |
| <b>Voltage-dependent anion-selective channel protein 3</b>        | Q60931 | 31  | 3  | YKVC65NYGLTFTQK (2)                                             |
| <b>WD repeat-containing protein 1</b>                             | O88342 | 66  | 2  | C438FSIDNPGYEPEVVAVHPGGDTVAVGGTDGNVR<br>(2)<br>SIQC325LTVHR (2) |

Each protein in the table satisfies the following criteria: (1) it is selectively captured with MRC organomercury resin and identified by mass spectrometry ( $\geq 2$  unique peptides); (2) after in-column digestion of the bound protein and treatment with performic acid, the peptide derived (last column) contains at least one cysteine sulfonic acid; (3) it is not detected in the negative controls that have been exposed to UV or treated with Cu/ascorbate. UniProt accession numbers correspond to the full-length unprocessed proteins when available ([www.uniprot.org](http://www.uniprot.org)). Additional accessions are listed if the observed peptides could not distinguish between protein isoforms.

<sup>1</sup>Number of unique peptides (not including sulfonated peptide) identified by MS/MS for a protein selectively captured on MRC column, and total number from two independent biological replicates (each from the thymuses of 3-4 mice).

<sup>2</sup>S-nitrosylated peptide (n: number of detections in 2 independent biological replicates). The cysteine residue(s), numbered as in the precursor protein, was identified in peptide capture experiment as cysteine sulfonic acid.

**Supplemental Table II. S-nitrosylated proteins in thymus of wildtype mouse**

| <b>Protein name</b>                                                                                                       | <b>Accession Number</b> | <b>Molecular Weight (kDa)</b> | <b>Unique peptides MRC<sup>1</sup></b> | <b>SNO Peptide sequence (n)<sup>2</sup></b>          |
|---------------------------------------------------------------------------------------------------------------------------|-------------------------|-------------------------------|----------------------------------------|------------------------------------------------------|
| <b>3-ketoacyl-CoA thiolase, mitochondrial</b>                                                                             | Q8BWT1                  | 42                            | 3                                      | EDC179DRYALQSQQR (1)                                 |
| <b>60S ribosomal protein L3</b>                                                                                           | P27659                  | 46                            | 3                                      | TVFAEHISDEC114K (2)                                  |
| <b>6-phosphogluconate dehydrogenase, decarboxylating</b>                                                                  | Q9DCD0                  | 53                            | 4                                      | C289LSSLKEER (1)                                     |
| <b>Aconitate hydratase, mitochondrial precursor</b>                                                                       | Q99KI0                  | 85                            | 9                                      | C410KSQFTITPGSEQIR (2)                               |
| <b>Adenylyl cyclase-associated protein 1</b>                                                                              | P40124                  | 52                            | 2                                      | LEAVSHTSDMHC29GYGDSPSK (2)<br>ALLATASQC92QQPAGNK (2) |
| <b>ADP/ATP translocase 2</b>                                                                                              | P51881                  | 33                            | 4                                      | GLGDC160LVK (1)                                      |
| <b>Aldose reductase</b>                                                                                                   | P45376                  | 36                            | 5                                      | HIDC45AQVYQNEKEVGVALQEK (2)                          |
| <b>Alpha-actinin-1</b>                                                                                                    | Q7TPR4                  | 103                           | 10                                     | C332QLEINFNTLQTK (1)<br>DGLGFC180ALIHR (2)           |
| <b>Aspartyl-tRNA synthetase, cytoplasmic</b>                                                                              | Q922B2                  | 57                            | 3                                      | IGSC130TQQDVELHVQK (2)                               |
| <b>Bifunctional purine biosynthesis protein PURH [Includes: Phosphoribosylaminoimidazolecarboxamide formyltransferase</b> | Q9CWJ9                  | 64                            | 4                                      | YTQSNSVC434YAK (2)                                   |
| <b>Calponin-2</b>                                                                                                         | Q08093                  | 33                            | 3                                      | C215ASQVGMTAPGTR (2)                                 |
| <b>Cathepsin B precursor</b>                                                                                              | P10605                  | 37                            | 2                                      | ILRGENHC319GIESEIVAGIPR (2)                          |
| <b>Cellular nucleic acid-binding protein</b>                                                                              | P53996                  | 20                            | 2                                      | EQC98C99YNCGKPGHLAR (2)<br>TSEVNC159YRCGESGHLAR (2)  |
| <b>Clathrin heavy chain</b>                                                                                               | Q68FD5                  | 192                           | 17                                     | YC910EKRDPHLAC919VAYER (2)                           |
| <b>Cofilin-1</b>                                                                                                          | P18760                  | 19                            | 5                                      | AVLFC39LSEDKK (2)                                    |
| <b>Coronin-1A</b>                                                                                                         | O89053                  | 51                            | 8                                      | KC345EPIAMTVPR (2)                                   |
| <b>Cystatin-B</b>                                                                                                         | Q62426                  | 11                            | 7                                      | VDVGGDKC64VHLR (2)                                   |
| <b>Cysteine and glycine-rich protein 1</b>                                                                                | P97315                  | 21                            | 5                                      | TVYFAEEVQC25EGNSFHK (2)                              |
| <b>Cytochrome b-c1 complex subunit 2, mitochondrial precursor</b>                                                         | Q9DB77                  | 48                            | 3                                      | NALANPLYC192PDYR (2)                                 |
| <b>Cytochrome c oxidase subunit 5B, mitochondrial precursor</b>                                                           | P19536                  | 14                            | 3                                      | C112PNCGTHYKLVPHQMAH (2)                             |
| <b>Cytosol aminopeptidase</b>                                                                                             | Q9CPY7                  | 56                            | 2                                      | LILADALC376YAHTFNPK (2)                              |
| <b>D-3-phosphoglycerate dehydrogenase</b>                                                                                 | Q61753                  | 57                            | 3                                      | ALVDHENVISC280PHLGASTK (2)                           |



|                                                                                            |        |     |    |                                                         |
|--------------------------------------------------------------------------------------------|--------|-----|----|---------------------------------------------------------|
| <b>DAZ-associated protein 1</b>                                                            | Q9JII5 | 43  | 4  | FKDPNC63VGTVLASRPHTLDGR (2)<br>IFVGGIPHNC124GETELR (1)  |
| <b>DNA replication licensing factor MCM2</b>                                               | P97310 | 102 | 4  | FDVLC661VVR (1)                                         |
| <b>DNA replication licensing factor MCM4</b>                                               | P49717 | 97  | 3  | AGIIC604QLNAR (2)                                       |
| <b>DNA replication licensing factor MCM6</b>                                               | P97311 | 93  | 9  | LVFLAC301HVAPT NPR (2)                                  |
| <b>Dolichyl-diphosphooligosaccharide--protein glycosyltransferase 63 subunit precursor</b> | Q9DBG6 | 69  | 2  | VAC478ITEQVLT LVNKR (1)                                 |
| <b>Electron transfer flavoprotein subunit alpha, mitochondrial precursor</b>               | Q99LC5 | 35  | 5  | C60DKVVQDLC68K (1)                                      |
| <b>Elongation factor 2</b>                                                                 | P58252 | 95  | 15 | NMSVIAHVVDHGKSTLTDSLVC41K (1)                           |
| <b>Eukaryotic translation initiation factor 5A-1</b>                                       | P63242 | 17  | 6  | KYEDIC73PSTHNMDVPNIKR (1)                               |
| <b>Ezrin</b>                                                                               | P26040 | 69  | 9  | ILQLC284MGNHELYMR (2)                                   |
| <b>Far upstream element-binding protein 1</b>                                              | Q91WJ8 | 69  | 2  | C328QHAAEITDLLR (2)                                     |
| <b>Fatty acid synthase</b>                                                                 | P19096 | 272 | 49 | C1464ILLSNLSNTSHAPK (2)<br>FVFTPHMEAEC1128LSESTALQK (1) |
| <b>Filamin-A</b>                                                                           | Q8BTM8 | 281 | 26 | AHVAPC1157FDASK (2)<br>C8GQSAAVASPGGSIDSR (2)           |
| <b>Filamin-B</b>                                                                           | Q80X90 | 278 | 17 | C416VYKPVQPGPHVVK (1)                                   |
| <b>FK506-binding protein 5</b>                                                             | Q64378 | 51  | 3  | KGEIC103HLLCKPEYAYGSAGHLQK (1)                          |
| <b>Fructose-bisphosphate aldolase A</b>                                                    | P05064 | 39  | 3  | ALSDHHVYLEGTLLKPNMVTPGHAC240TQK (1)                     |
| <b>Galectin-1</b>                                                                          | P16045 | 15  | 3  | FNAHG DANTIVC61NTK (2)<br>SFVLNLGKDSNNLC43LHFNPR (2)    |
| <b>Gelsolin precursor</b>                                                                  | P13020 | 86  | 3  | SEDC329FILDHGR (2)                                      |
| <b>Glutamate dehydrogenase 1, mitochondrial precursor</b>                                  | P26443 | 61  | 3  | IIKPC112NHVLSLSPIRR (2)                                 |
| <b>Glyceraldehyde-3-phosphate dehydrogenase</b>                                            | P16858 | 36  | 7  | VPTPNVSVVDLTC245R (1)                                   |
| <b>Glycyl-tRNA synthetase</b>                                                              | Q9CZD3 | 82  | 2  | SC456YDLSC461HAR (1)                                    |
| <b>Guanine nucleotide-binding protein G(i), alpha-2 subunit</b>                            | P08752 | 40  | 4  | EIYTHFTC326ATDTK (2)                                    |
| <b>Heat shock cognate 71 protein</b>                                                       | P63017 | 71  | 13 | GPAVGIDLGTTYSC17VGVFQHGK (1)                            |
| <b>Hemoglobin subunit alpha</b>                                                            | P01942 | 15  | 3  | LLSHC105LLVTLASHHPADFTPAVHASL DK (1)                    |
| <b>Hemoglobin subunit beta-1</b>                                                           | P02088 | 16  | 9  | GTFASLSELHC94DKLHVDPENFR (2)                            |
| <b>Heterogeneous nuclear ribonucleoprotein A3</b>                                          | Q8BG05 | 40  | 17 | GFGFVTYSC85VEEVDAAMC94ARPHKVDGR (2)                     |

|                                                                                  |        |     |    |                                                       |
|----------------------------------------------------------------------------------|--------|-----|----|-------------------------------------------------------|
| <b>Heterogeneous nuclear ribonucleoprotein D0</b>                                | Q60668 | 38  | 3  | GFC226FITFKEEEPVKK (1)                                |
| <b>Heterogeneous nuclear ribonucleoprotein H</b>                                 | O35737 | 49  | 7  | DLNYC267FSGMSDHR (1)                                  |
| <b>Heterogeneous nuclear ribonucleoprotein L</b>                                 | Q8R081 | 60  | 10 | LC578FSTAQHAS (1)                                     |
| <b>Heterogeneous nuclear ribonucleoprotein Q</b>                                 | Q7TMK9 | 70  | 2  | GFC289FLEYEDHK (1)                                    |
| <b>High mobility group protein B1</b>                                            | P63158 | 25  | 5  | RPPSAFFLFC106SEYRPK (1)                               |
| <b>Inosine-5'-monophosphate dehydrogenase 2</b>                                  | P24547 | 56  | 7  | HGFC140GIPITDTGR (1)                                  |
| <b>Leukotriene A-4 hydrolase</b>                                                 | P24527 | 69  | 6  | QHPYLFSQC136QAIHC141R (2)                             |
| <b>LIM and SH3 domain protein 1</b>                                              | Q61792 | 30  | 6  | KPYC53NAHYPK (2)                                      |
| <b>Long-chain specific acyl-CoA dehydrogenase, mitochondrial precursor</b>       | P51174 | 48  | 3  | AFVDSC351LQLHETKR (2)                                 |
| <b>Myosin-10</b>                                                                 | Q61879 | 229 | 2  | ADFC569IIHYAGK (2)                                    |
| <b>Phospholipase A-2-activating protein</b>                                      | P27612 | 87  | 3  | LSC12SLPGHELDVR (1)                                   |
| <b>Poly(rC)-binding protein 1</b>                                                | P60335 | 37  | 4  | C201SDAAGYPHATHDLEGPPLDAYSIQGQHT<br>ISPLDLAK (2)      |
| <b>Probable ATP-dependent RNA helicase DDX17</b>                                 | Q501J6 | 72  | 3  | LKSTC200IYGGAPK (2)                                   |
| <b>Profilin-1</b>                                                                | P62962 | 15  | 9  | C128YEMASHLR (2)                                      |
| <b>Proliferating cell nuclear antigen</b>                                        | P17918 | 29  | 4  | IC148RDLSHIGDAVVISC162AK (1)                          |
| <b>Proteasome subunit alpha type-3</b>                                           | O70435 | 28  | 3  | C42KDGVVFGVEK (2)                                     |
| <b>Protein RCC2</b>                                                              | Q8BK67 | 56  | 4  | DVAC335GANHTLVLDSQKR (2)<br>TVVSGSC156AAHSLITTEGK (2) |
| <b>Pyruvate dehydrogenase E1 component subunit beta, mitochondrial precursor</b> | Q9D051 | 39  | 2  | C41DLHRLEEGPPVTTVLTR (2)                              |
| <b>Pyruvate kinase isozymes M1/M2</b>                                            | P52480 | 58  | 15 | AGKPVIC326ATQMLESNIK (1)                              |
| <b>Rab GDP dissociation inhibitor beta</b>                                       | Q61598 | 51  | 6  | AYDATTHFETTC414DDIKDIYKR (1)                          |
| <b>Ras-related C3 botulinum toxin substrate 2 precursor</b>                      | Q05144 | 21  | 3  | C6VVVGDGAVGK (1)<br>AVLC178PQPTR (1)                  |
| <b>Rho guanine nucleotide exchange factor 1</b>                                  | Q61210 | 103 | 2  | FC536AFVQEAESRPR (1)                                  |
| <b>Rho-related GTP-binding protein RhoG precursor</b>                            | P84096 | 21  | 2  | T18CLLIC'YTTNAFPK (2)                                 |
| <b>RNA-binding protein 39</b>                                                    | Q8VH51 | 59  | 2  | C478PSIAAAIAAVNALHGR (2)                              |
| <b>Sarcoplasmic/endoplasmic reticulum calcium ATPase 2</b>                       | O55143 | 115 | 3  | C560LALATHDNPLKR (2)                                  |
| <b>Serotransferrin precursor</b>                                                 | Q921I1 | 77  | 7  | C543LVEKGDVAFVK (2)                                   |
| <b>S-formylglutathione hydrolase</b>                                             | Q9R0P3 | 31  | 2  | C11FGGLQK (2)                                         |

|                                            |        |     |   |                           |
|--------------------------------------------|--------|-----|---|---------------------------|
| <b>Spliceosome RNA helicase Bat1</b>       | Q9Z1N5 | 49  | 2 | NC165PHIVVGTGTPGR (2)     |
| <b>TAR DNA-binding protein 43</b>          | Q921F2 | 45  | 3 | YRNPVSQLC50MR (1)         |
| <b>T-complex protein 1 subunit alpha A</b> | P11984 | 60  | 7 | SLHDALC397VVKR (2)        |
| <b>T-complex protein 1 subunit beta</b>    | P80314 | 57  | 6 | ILKHGINC289FINR (2)       |
| <b>T-complex protein 1 subunit epsilon</b> | P80316 | 60  | 9 | IAILTC253PFEPKPK (2)      |
| <b>Thioredoxin</b>                         | P10639 | 12  | 3 | C73MPTFQFYK (1)           |
| <b>Tubulin beta-2C chain</b>               | P68372 | 50  | 2 | MREIVHIQAGQC12GNQIGAK (2) |
| <b>Valyl-tRNA synthetase</b>               | Q9Z1Q9 | 140 | 4 | C681GEMAQAASAAVTR (2)     |
| <b>WD repeat-containing protein 1</b>      | O88342 | 66  | 6 | SIQC325LTVHR (2)          |

See Supplemental Table I for explanation.

**Supplemental Table III. S-nitrosylated proteins in thymus of DKO mouse thymus**

| <b>Protein name</b>                              | <b>Uniprot accession number</b> | <b>Molecular weight (kDa)</b> | <b>Unique peptides MRC<sup>1</sup></b> | <b>SNO Peptide sequence (n)<sup>2</sup></b>                                                                            |
|--------------------------------------------------|---------------------------------|-------------------------------|----------------------------------------|------------------------------------------------------------------------------------------------------------------------|
| <b>40S ribosomal protein S14</b>                 | P62264                          | 16kDa                         | 3                                      | C <sub>85</sub> KELGITALHIK (2)                                                                                        |
| <b>40S ribosomal protein S3a</b>                 | P97351                          | 30kDa                         | 3                                      | AC <sub>201</sub> QSIYPLHDVFVR (1)                                                                                     |
| <b>Actin, cytoplasmic 1</b>                      | P60710                          | 42                            | 15                                     | FRC <sub>257</sub> PEALFQPSFLGMESC <sub>272</sub> GIHETTFNSIMK (1)<br>C <sub>285</sub> DVDIRKDLYANTVLSGGTTMYPGIADR (1) |
| <b>Cystatin-B</b>                                | Q62426                          | 11                            | 3                                      | VDVGGDKC <sub>64</sub> VHLR (2)                                                                                        |
| <b>Glyceraldehyde-3-phosphate dehydrogenase</b>  | P16858                          | 36                            | 3                                      | VPTPNVSVVDLTC <sub>245</sub> R (1)                                                                                     |
| <b>Hemoglobin subunit beta-1</b>                 | P02088                          | 16 kDa                        | 3                                      | GTFASLSELHC <sub>94</sub> DK (2)                                                                                       |
| <b>Heterogeneous nuclear ribonucleoprotein L</b> | Q8R081                          | 63kDa                         | 3                                      | LC <sub>578</sub> FSTAQHAS (1)                                                                                         |
| <b>Peptidyl-prolyl cis-trans isomerase A</b>     | P17742                          | 18 kDa                        | 9                                      | IIPGFMC <sub>62</sub> QGGDFTR (2)                                                                                      |
| <b>Profilin-1</b>                                | P62962                          | 15 kDa                        | 6                                      | C <sub>128</sub> YEMASHLR (2)                                                                                          |
| <b>Pyruvate kinase isozymes M1/M2</b>            | P52480                          | 58 kDa                        | 2                                      | C <sub>423</sub> C <sub>424</sub> SGAIIVLTK (2)                                                                        |

See Supplementary Table I for explanation.
